# Supplementary material for: Selective sensing of zinc ions with a novel magnetic resonance imaging contrast agent†
Source: Royal Society of Chemistry journal article supplement (doi:10.1039/b100994j), 2001-01-01

**Supplementary data**

HPLC confirmation of complexes:

The purity of Gd3+ DTPA-bisamide complex (**7a**) was confirmed by HPLC (**Figure S1**): retention time, 7.5 min (purity, 99.5 % integrated intensity); Inertsil ODS-3 4.6 mmx250 mm (Gl Sciences); eluent 56% methanol / H2O; flow rate, 1.0 ml; UV, 254 nm.

The purity of Gd3+ DTPA-amide-ethylester complex (**7b**) was confirmed by HPLC (**Figure S2**): retention time, 6.3 min (purity, 99.5 % integrated intensity); Inertsil ODS-3 4.6 mmx250 mm (Gl Sciences); eluent, 48 % methanol / H2O; flow rate, 1.0 ml; UV, 254 nm.


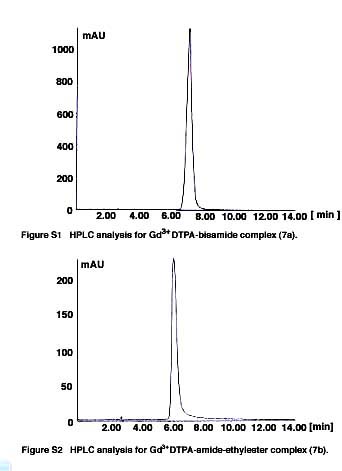

Supplement: b100994j.doc [file b100994j.doc]
